# Supplementary material for: An IgM antibody targeting the receptor binding site of influenza B blocks viral infection with great breadth and potency
Source: PubMed Central journal article supplement — Theranostics. 2019 Jan 1;9(1):210–31. doi: 10.7150/thno.28434 (PMC6332795; doi:10.7150/thno.28434), 2019-01-01
Supplement: thnov09p0210s1.pdf [file thnov09p0210s1.pdf]

1 **Supplementary Material**

2  
3 Table. S1. Monoclonal antibodies used in this study

4

| Antibody name   | Specificity            | Reference             |
|-----------------|------------------------|-----------------------|
| C7G6-IgM        | HA (RBS <sup>1</sup> ) | <i>β</i> <sup>3</sup> |
| C7G6-IgG        | HA (RBS <sup>1</sup> ) | <i>β</i> <sup>3</sup> |
| C3G10-IgM       | HA (RBS <sup>1</sup> ) | <i>β</i> <sup>3</sup> |
| C3G10-IgG       | HA (RBS <sup>1</sup> ) | <i>β</i> <sup>3</sup> |
| C10H10-IgM      | HA (RBS <sup>1</sup> ) | <i>β</i> <sup>3</sup> |
| C10H10-IgG      | HA (RBS <sup>1</sup> ) | <i>β</i> <sup>3</sup> |
| C11B10          | HA (RBS <sup>1</sup> ) | <i>β</i> <sup>3</sup> |
| C12G6           | HA (RBS <sup>1</sup> ) | [21]                  |
| CR8033-like     | HA (RBS <sup>1</sup> ) | [18]                  |
| CR8071-like     | HA (VE <sup>2</sup> )  | [18]                  |
| CR9114-like-IgM | HA (Stem)              | [18]                  |
| CR9114-like-IgG | HA (Stem)              | [18]                  |
| 5A7-like        | HA1 (C terminal)       | [19]                  |
| 46B8-like       | HA (VE <sup>2</sup> )  | [20]                  |

5 <sup>1</sup>RBS: receptor binding site

6 <sup>2</sup>VE: vestigial esterase domain

7 <sup>3</sup>antibody generated in this study

8

9  
10  
11  
12  
13  
14  
15  
16  
17  
18  
19  
20  
21  
22  
23  
24  
25  
26  
27  
28  
29  
30  
31  
32  
33  
34  
35  
36  
37  
38  
39  
40  
41  
42  
43  
44  
45  
46  
47  
48  
49  
50

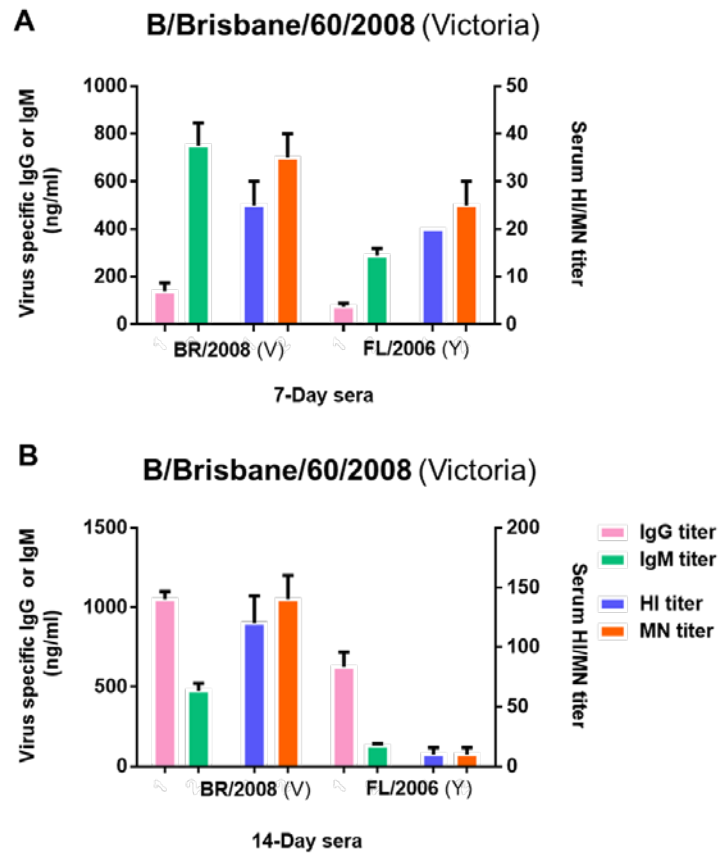

**Fig. S1. Characterization of 7-day and 14-day anti-influenza sera following intranasal immunization with Victoria lineage strain of influenza B virus.** Shown are data for serum total IgG titers, serum total IgM titers, serum HI titers and serum MN titers of BR/2008-immunized sera against two representative influenza B viruses, FL/2006 and BR/2008, analyzed in parallel. Recombinant HA proteins of FL/2006 and BR/2008 were used as ELISA plate-coating antigens. IgG and IgM titers were determined with quantitative ELISA and are expressed in ng/ml. Bars represent averages and standard errors.

51  
52

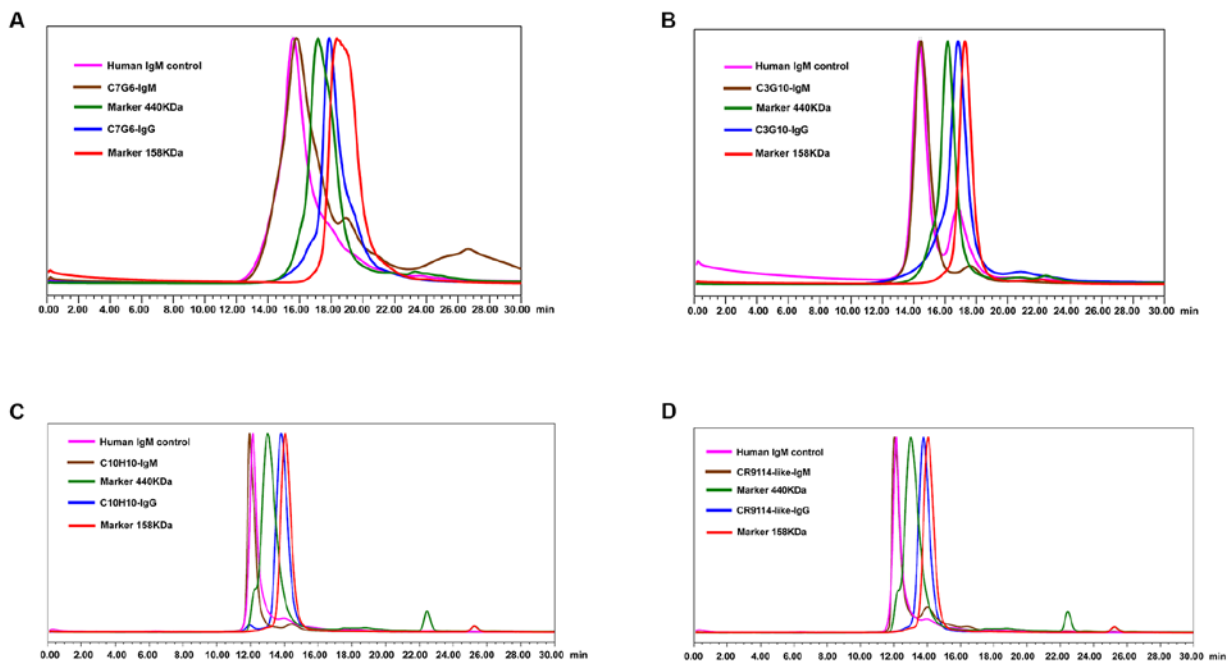

53  
54  
55  
56  
57  
58  
59  
60

**Fig. S2. HPLC analysis of the IgM and IgG subtypes of C7G6 (A), C3G10 (B), C10H10 (C) and CR9114-like (D).** Purified human IgM and protein standards (440 kDa and 158 kDa) were used as controls.

61  
62  
63  
64  
65  
66  
67  
68  
69  
70  
71  
72  
73  
74  
75  
76  
77  
78

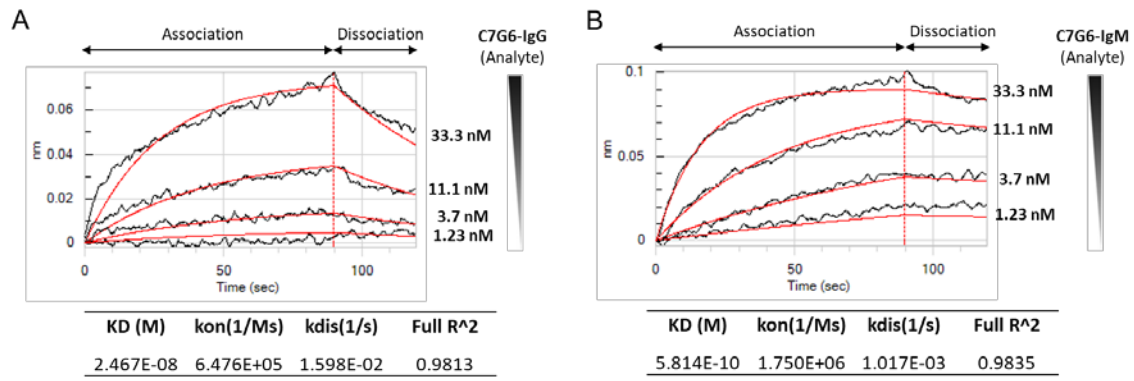

**Fig. S3.** Binding kinetics of C7G6-IgG and C7G6-IgM to B/Florida/4/2006 HA protein were measured using bio-layer interferometry (BLI). Biotin-B/Florida/4/2006 HA protein was immobilized on Streptavidin (SA) Biosensor tips and incubated with antibodies at concentrations ranging from 1.23 nM to 33.3 nM. **(A)** The affinity of C7G6-IgG to B/Florida/4/2006 HA is 24.67 nM and **(B)** the affinity of C7G6-IgM to B/Florida/4/2006 HA is 0.58 nM.

79  
80  
81  
82  
83  
84  
85  
86  
87  
88  
89  
90  
91  
92  
93  
94  
95  
96  
97  
98  
99  
100  
101  
102  
103  
104  
105  
106  
107  
108  
109  
110  
111  
112  
113  
114  
115  
116  
117  
118

| Virus strains |                              | MN-IC <sub>50</sub> (µg/ml) |               |          |
|---------------|------------------------------|-----------------------------|---------------|----------|
|               |                              | C7G6-IgM-pen                | C7G6-IgM-mono | C7G6-IgG |
| Ancestral     | B/Lee/1940                   | 4.42                        | >50           | >50      |
|               | B/Taiwan/2/1962              | 0.55                        | 8.84          | 17.68    |
|               | B/Singapore/3/1964           | 0.55                        | 35.36         | >50      |
| Yamagata      | B/Florida/4/2006             | 0.28                        | 2.21          | 1.84     |
|               | B/Victoria/507/2007-like     | 0.73                        | 2.21          | 2.21     |
|               | B/Brisbane/3/2007-like       | 0.28                        | 1.84          | 1.84     |
|               | B/Massachusetts/02/2012-like | 0.28                        | >50           | 23.57    |
|               | B/Singapore/Gp414/2014-like  | 0.55                        | 17.68         | 17.68    |
|               | B/California/10/2016-like    | 0.55                        | 35.36         | 8.84     |
| Victoria      | B/Hong Kong/330/2001         | 0.28                        | 2.21          | 2.21     |
|               | B/Malaysia/2506/2004         | 0.55                        | 4.42          | 8.84     |
|               | B/Taiwan/94/2005-like        | 0.55                        | 35.36         | 17.68    |
|               | B/New York/1093/2006-like    | 0.46                        | 17.68         | 17.68    |
|               | B/Brisbane/60/2008           | 0.73                        | 17.68         | 35.36    |
|               | B/Brisbane/33/2008           | 1.1                         | 35.36         | 23.57    |
|               | B/Hong Kong/537/2009-like    | 2.21                        | 35.36         | 35.36    |
|               | B/Rhode Island/01/2012-like  | 1.1                         | >50           | 17.68    |
|               | B/New York/1352/2012-like    | 1.84                        | 35.36         | 29.47    |
|               | B/Washington/07/2014-like    | 1.84                        | 35.36         | 35.36    |
|               | B/California/11/2016-like    | 1.1                         | >50           | >50      |
| H1N1          | A/California/04/2009         | >50                         |               | >50      |

**Fig. S4. *In vitro* neutralization activities (IC<sub>50</sub> values) of pentameric and monomeric forms of the C7G6 antibody.** Fifty percent inhibitory concentrations (IC<sub>50</sub>) of C7G6-IgM-pen (pentameric form), C7G6-IgM-mono (monomeric form) and C7G6-IgG against representative strains from the three influenza B lineages and an H1N1 subtype influenza A virus were determined by performing microneutralization assays. The values are representative of three independent experiments and reported in µg/ml; one representative dataset is shown. The values below 50µg/ml are color-filled; red shades=strong reactivity; yellow shades=moderate reactivity; green shades=weak reactivity; no reactivity is indicated by >50.

119  
120  
121  
122  
123  
124  
125  
126  
127  
128  
129  
130  
131  
132  
133  
134  
135  
136  
137  
138  
139  
140  
141

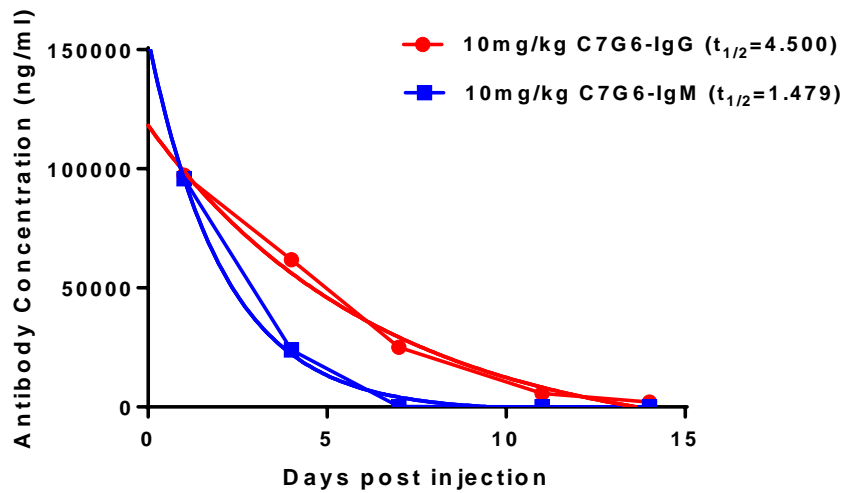

**Fig. S5. Serum antibody concentrations after C7G6-IgG or C7G6-IgM treatment.** Antibody half-lives were measured in 6- to 8-week-old female BALB/c mice injected intravenously (i.v.) with a single dose of purified antibodies (C7G6-IgG or C7G6-IgM) at a concentration of 10 mg/kg. The mice were bled on days 1, 4, 7, 11, and 14 and serum antibody levels measured by ELISA. The  $t_{1/2}$  of the elimination phase was determined with a one-phase exponential decay model using data points between days 1 and 14 post-injection. This experiment was repeated three times; one representative dataset is shown.  $n = 5/\text{group}$ .

142  
 143  
 144  
 145  
 146  
 147  
 148  
 149  
 150  
 151  
 152  
 153  
 154  
 155  
 156  
 157  
 158  
 159  
 160  
 161  
 162  
 163  
 164  
 165  
 166  
 167  
 168  
 169  
 170  
 171  
 172  
 173  
 174  
 175  
 176  
 177  
 178  
 179  
 180  
 181  
 182  
 183  
 184  
 185  
 186

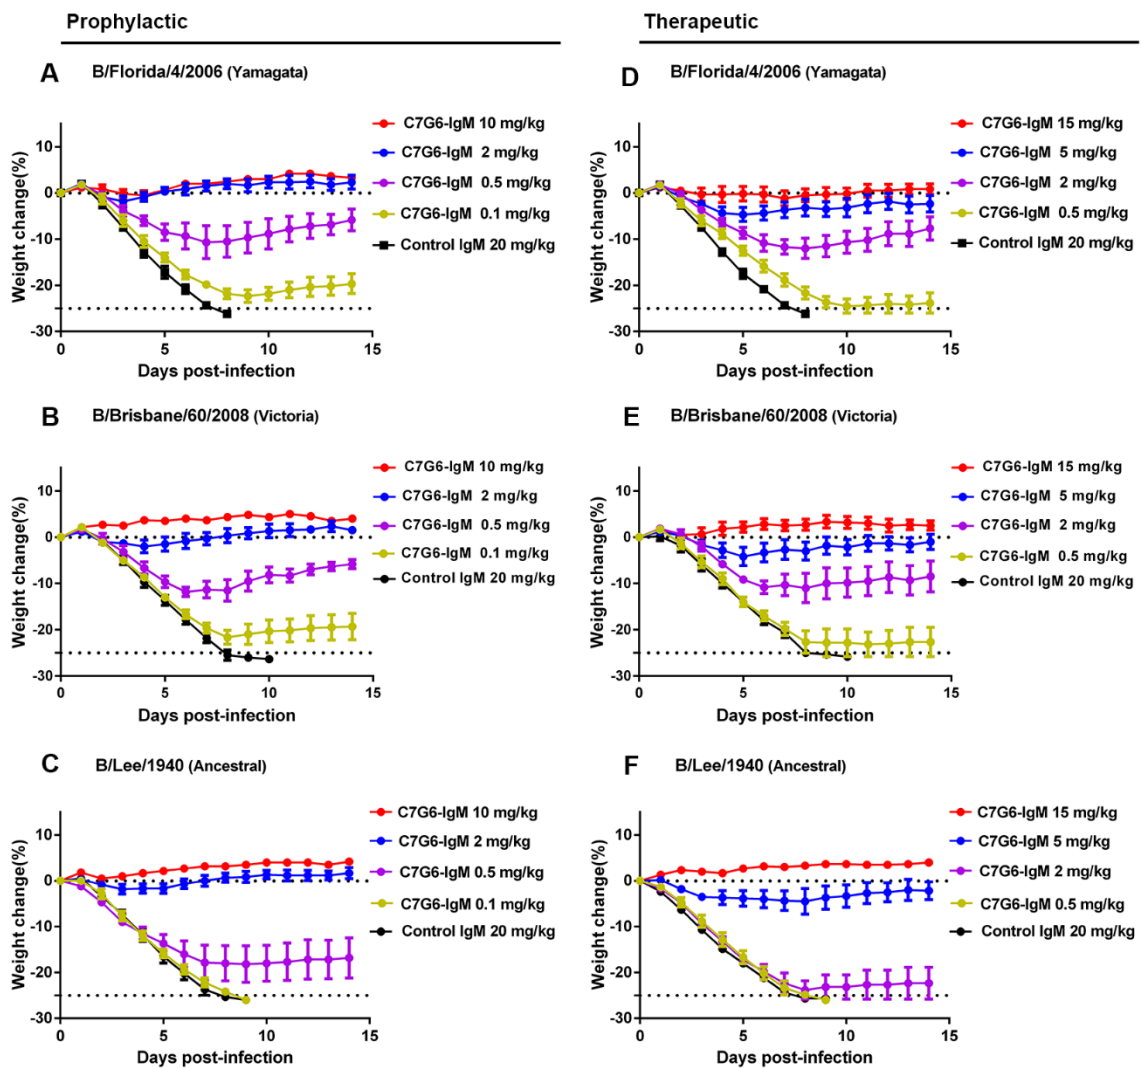

**Fig. S6. Body weight change curves of mice treated with C7G6-IgM before or after challenge with influenza B viruses.** (A to C) The prophylactic efficacy of C7G6-IgM against lethal challenge with mouse-adapted B/Florida/4/2006 (Yamagata) (A), B/Brisbane/60/2008 (Victoria) (B) or B/Lee/1940 (Ancestral) (C) viruses. Shown are the weight changes of BALB/c mice ( $n=6$ /group) treated with 10, 2, 0.5 or 0.1 mg/kg C7G6-IgM or 20 mg/kg control IgM one day prior to lethal challenge (25 MLD<sub>50</sub>) via intranasal inoculation (at day 0). (D to F) For the therapeutic groups, weight change curves are shown for mice that received different doses of C7G6-IgM or 20 mg/kg control IgM one day after lethal challenge with 25 MLD<sub>50</sub> of mouse-adapted B/Florida/4/2006 (D), B/Brisbane/60/2008 (E) or B/Lee/1940 (F) virus. The mice were infected and subsequently treated with 15, 5, 2 or 0.5 mg/kg C7G6-IgM. This experiment was repeated three times; one representative dataset is shown. The body weight curves represent the mean  $\pm$  95% confidence interval of the mean. If a mouse died or was euthanized during the study, the last observed body weight was carried forward until all the mice in the group had died. The control IgM is C5G6-IgM (a chimeric mAb against 2009 pandemic H1N1 influenza A viruses) [18].

187  
 188  
 189  
 190  
 191  
 192  
 193  
 194  
 195  
 196  
 197  
 198  
 199  
 200  
 201  
 202  
 203  
 204  
 205  
 206  
 207  
 208  
 209  
 210  
 211  
 212  
 213  
 214  
 215  
 216  
 217  
 218

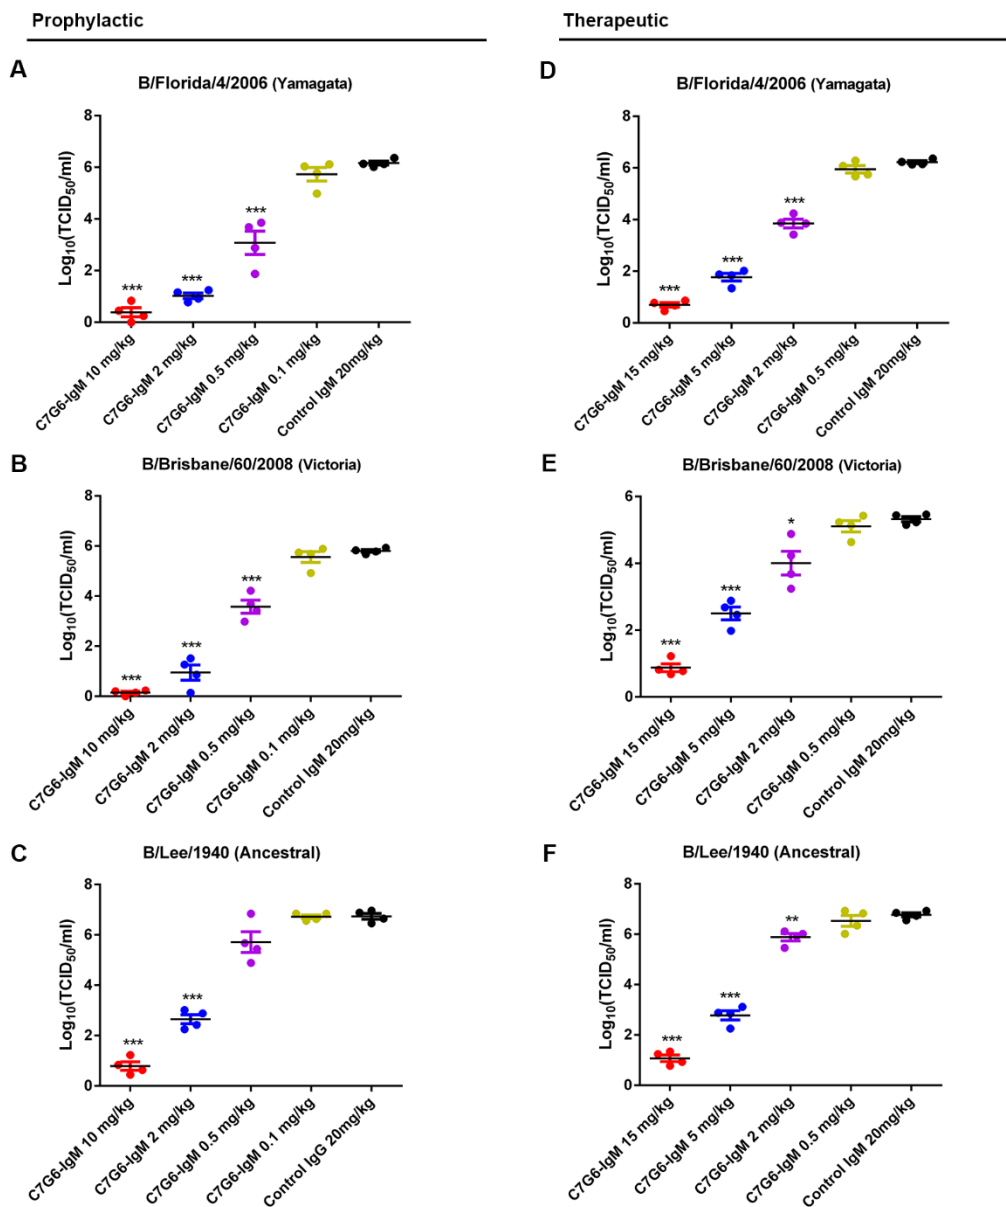

219 **Fig. S7. Analysis of lung virus titers from mice treated with C7G6-IgM.** (A to C) Mice (n=4 per  
 220 group) were treated with C7G6-IgM at the indicated doses 1 day before lethal challenge with mouse-  
 221 adapted B/Florida/4/2006 (Yamagata) (A), B/Brisbane/60/2008 (Victoria) (B) or B/Lee/1940 (Ancestral)  
 222 (C) virus. (D to F) Mice (n=4 per group) were treated with C7G6-IgM at the indicated doses 1 day after  
 223 lethal challenge with mouse-adapted B/Florida/4/2006 (Yamagata) (D), B/Brisbane/60/2008 (Victoria)  
 224 (E) or B/Lee/1940 (Ancestral) (F) virus. Lungs were collected for determination of virus titers 4 days  
 225 after infection. The values are representative of three independent experiments; one representative  
 226 dataset is shown. Black bars are mean values and error bars represent SE. The t-test was used to  
 227 assess the significance of lung viral titers. \*P < 0.05, \*\*P < 0.01 and \*\*\*P < 0.001, compared to the  
 228 control IgM-treated group. TCID<sub>50</sub>, median tissue culture infectious dose. The control IgM is C5G6-IgM  
 229 [18].

230  
 231



232  
 233  
 234  
 235  
 236  
 237  
 238  
 239  
 240  
 241  
 242  
 243  
 244  
 245  
 246  
 247  
 248  
 249  
 250  
 251  
 252  
 253  
 254  
 255  
 256  
 257  
 258  
 259  
 260  
 261  
 262  
 263  
 264  
 265  
 266  
 267  
 268  
 269  
 270  
 271  
 272

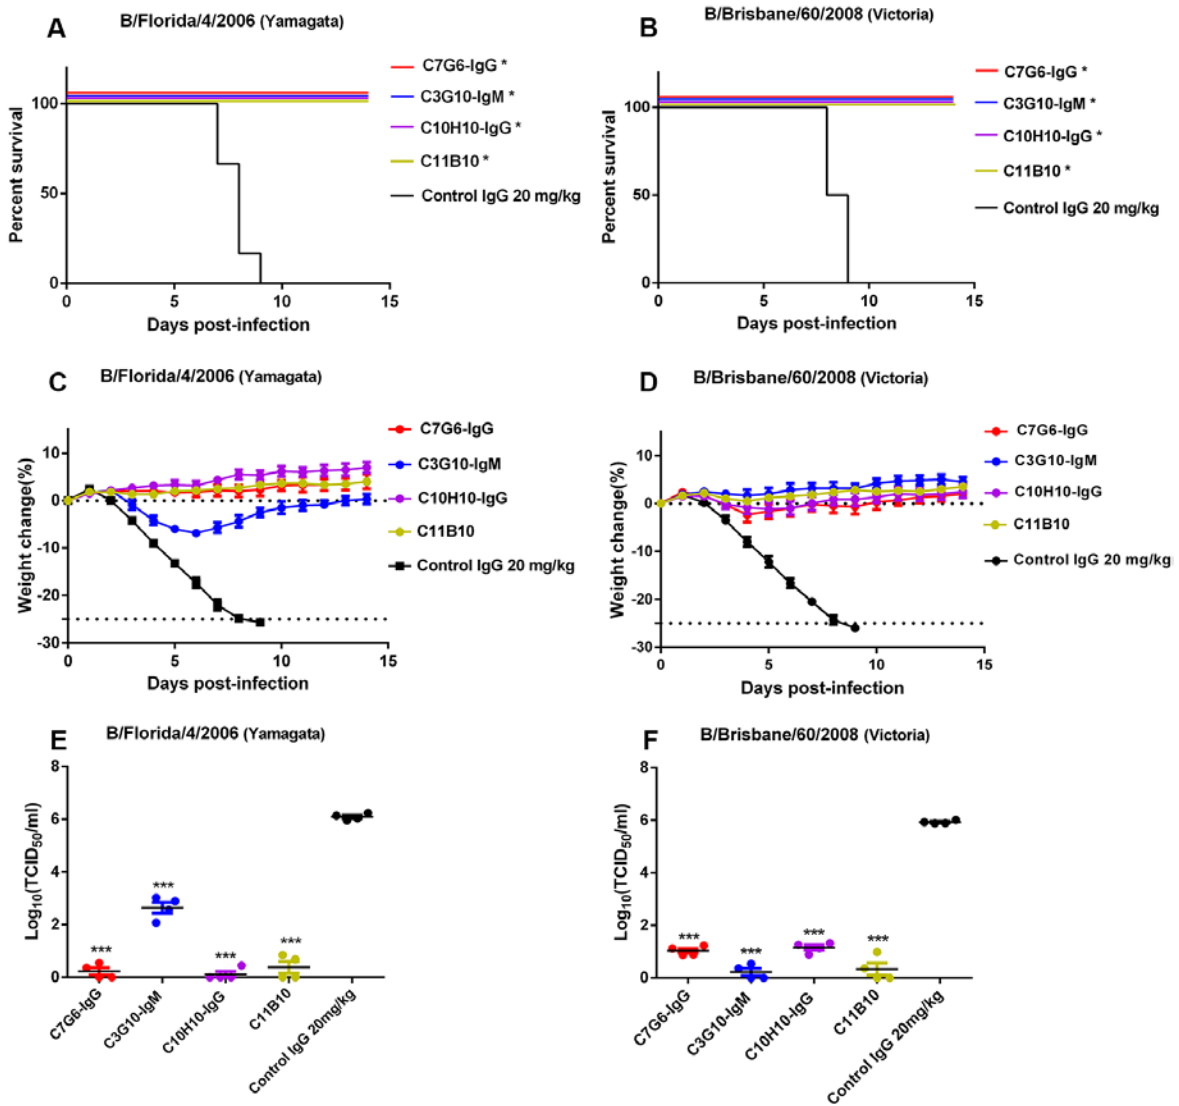

**Fig. S8. *In vivo* protective efficacy of C7G6-IgG, C3G10-IgM, C10H10-IgG and C11B10 in mice.** (A to F) Survival curves (A and B), body weight change (C and D), and lung viral titers (E and F) for BALB/c mice ( $n = 6$  per group for A to D and  $n=4$  per group for E and F) treated intraperitoneally with the indicated antibodies (10 mg/kg), 24 hours after lethal challenge with 25 MLD<sub>50</sub> of MA-B/Florida/4/2006 or MA-B/Brisbane/60/2008. Lungs were collected for determination of virus titers on day 4 after infection. This experiment was repeated three times, and one representative dataset is shown. The black bars indicate mean values. The body weight curves represent mean  $\pm$  95% confidence interval of the mean. If a mouse died or was euthanized during the study, the last observed body weight was carried forward until all the mice in the group had died. For (A) and (B), statistical analysis was performed by log-rank test. For (E) and (F), statistical analysis was performed by t-test. \* $P < 0.05$  and \*\*\* $P < 0.001$ , compared to the control IgG-treated group. The control IgG is C5G6 [18].

273  
 274  
 275  
 276  
 277  
 278  
 279  
 280  
 281  
 282  
 283  
 284  
 285  
 286  
 287  
 288  
 289  
 290  
 291  
 292  
 293  
 294  
 295  
 296  
 297  
 298  
 299  
 300  
 301  
 302  
 303  
 304  
 305

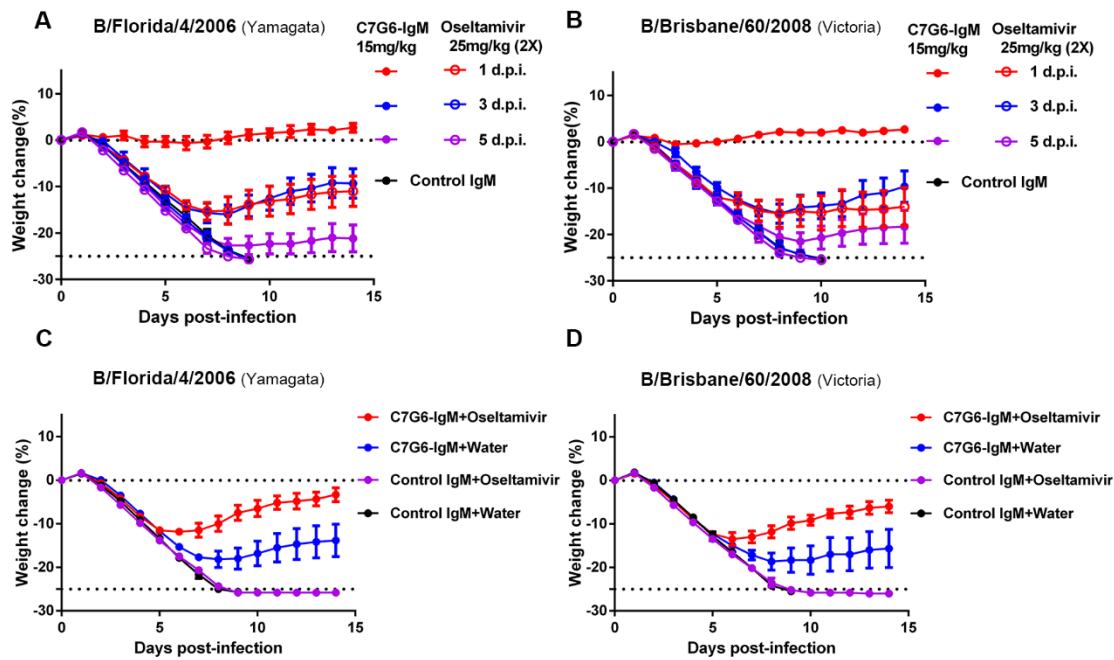

**Fig. S9. Comparison and combination of therapeutic effects of C7G6-IgM and oseltamivir against influenza B infection in mice.** (A and B) Weight loss curves of BALB/c mice ( $n = 6$  per group) that received 15 mg/kg C7G6-IgM (closed symbols) or 25 mg/kg oseltamivir (open symbols) or 25mg/kg C5G6-IgM on the indicated day following intranasal infection with 25 MLD<sub>50</sub> of MA-B/Florida/4/2006 (A) or MA-B/Brisbane/60/2008 (B). (C and D) Body weight changes in BALB/c mice ( $n = 6$  per group) that received a single treatment of C7G6-IgM or a control IgM (C5G6-IgM) intraperitoneally at 5 mg/kg, oseltamivir orally at 25 mg/kg twice a day for 4 days, or a combined treatment of C7G6-IgM and oseltamivir, starting from 2 days after intranasal infection with 25 MLD<sub>50</sub> of MA-B/Florida/4/2006 (C) or MA-B/Brisbane/60/2008 (D). The values are representative of three independent experiments; one representative dataset is shown. The body weight curves represent mean $\pm$ 95% confidence interval of the mean. If a mouse died or was euthanized during the study, the last observed body weight was carried forward until all the mice in the group had died. d.p.i.: days post-infection.

306  
 307  
 308  
 309  
 310  
 311  
 312  
 313  
 314  
 315  
 316  
 317  
 318  
 319  
 320  
 321  
 322  
 323  
 324  
 325  
 326  
 327  
 328  
 329  
 330  
 331  
 332

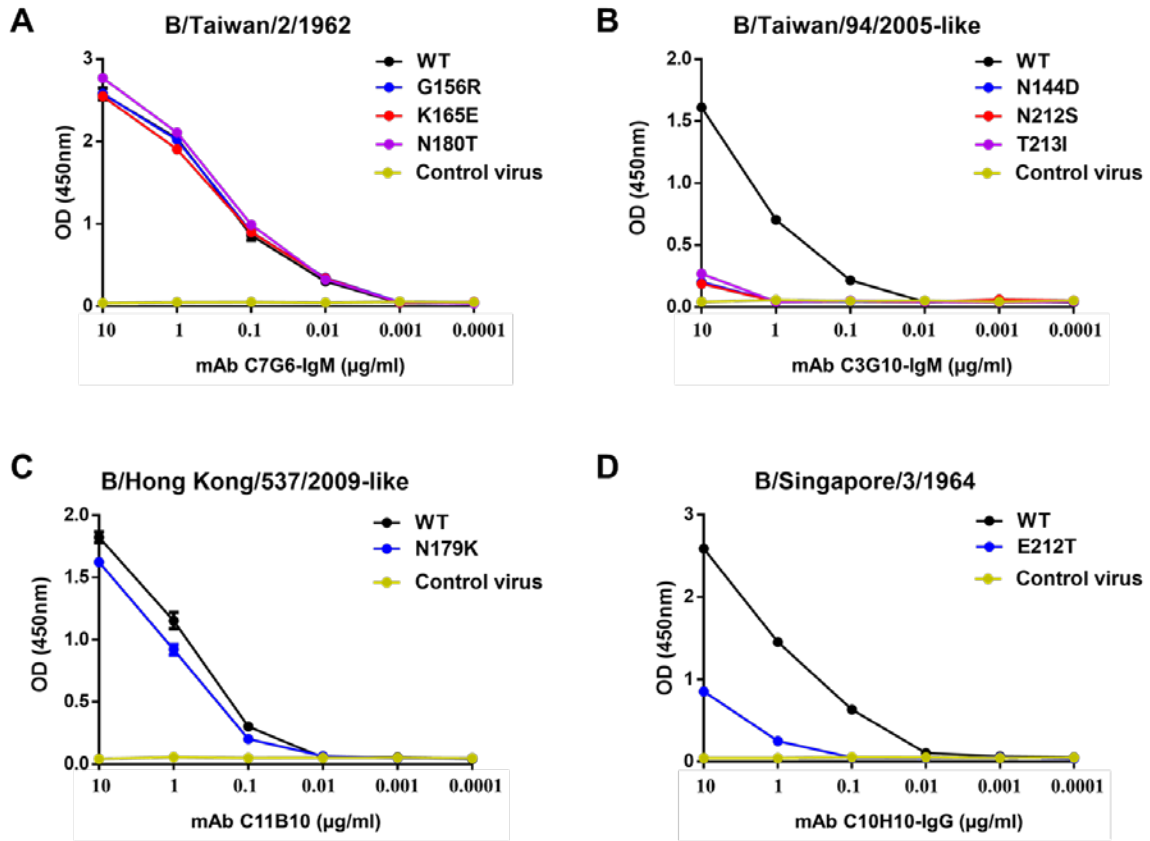

**Fig. S10. Reactivity of C7G6-IgM, C3G10-IgM, C11B10 or C10H10-IgG with WT or corresponding escape mutant viruses in ELISA.** The indicated concentrations of C7G6-IgM, C3G10-IgM, C11B10 or C10H10-IgG were reacted with purified WT or their respective escape mutants, or the control virus, A/California/04/2009 in ELISA.

333  
334  
335  
336  
337  
338  
339  
340  
341  
342  
343  
344  
345  
346  
347  
348  
349  
350  
351  
352  
353  
354  
355

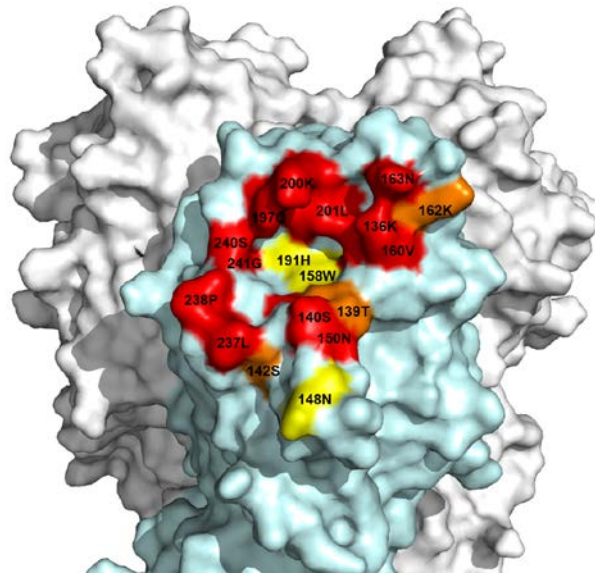

**Fig. S11. Comparison of the published CR8033 epitope with the CR8033 epitope predicted using a molecular docking method.** Red=common contact residues using the two methods, yellow=contact residues unique to predicted CR8033 epitope; orange=contact residues unique to published CR8033 epitope.

356  
357  
358  
359  
360  
361  
362  
363  
364  
365  
366  
367  
368  
369  
370  
371  
372  
373  
374  
375  
376  
377  
378  
379  
380  
381  
382  
383  
384  
385  
386  
387  
388  
389  
390  
391  
392  
393  
394  
395  
396

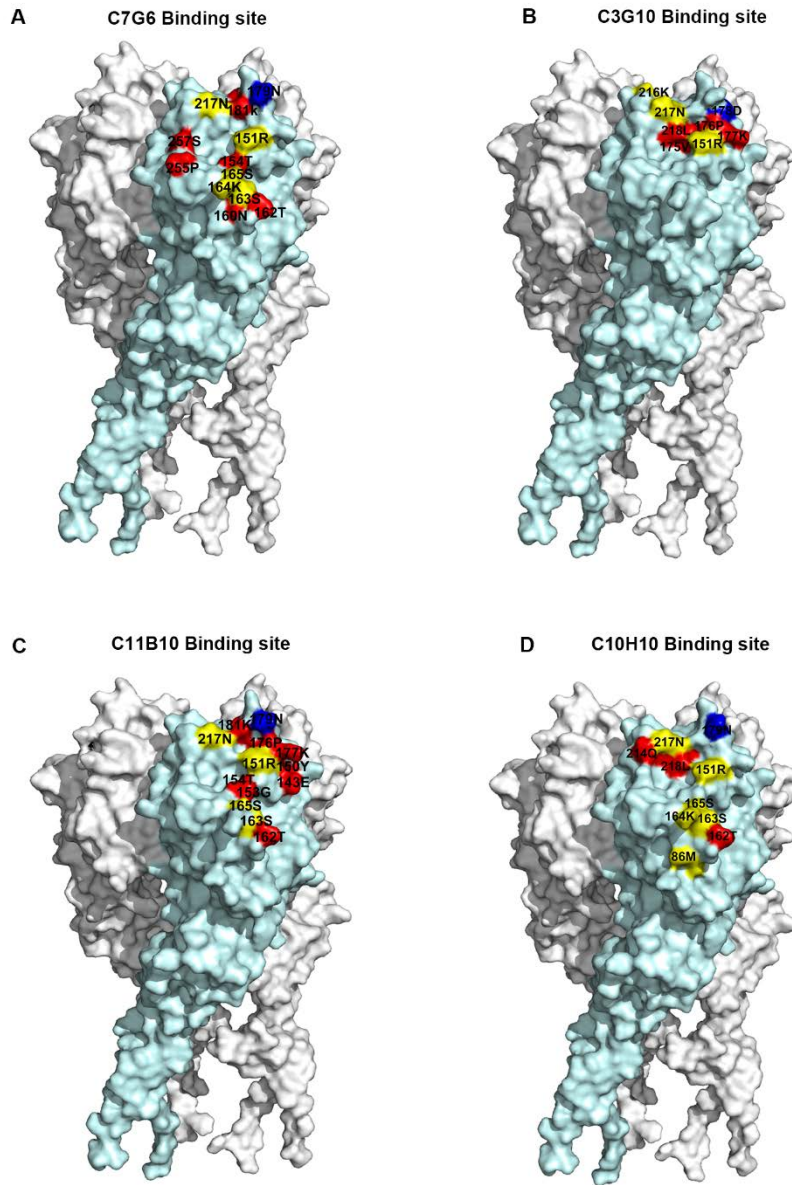

**Fig. S12. Conservation analysis of the neutralizing epitopes recognized by C7G6 (A), C3G10 (B), C11B10 (C) and C10H10 (D).** Conservation analysis of the epitopes of the indicated antibodies on the HA trimer model of B/Florida/4/2006, using DS Visualizer 1.7. One HA protomer of the HA trimer is colored in cyan, whereas the other two protomers are colored in gray. The residues are colored according to the conservation of contact residues across all available influenza B virus sequences: red, more than 97% conserved; blue, 84 to 97% conserved; yellow, 48 to 84% conserved. Residue numbers are shown in black.

| Residue | C7G6-IgM<br>Frequency (%) |      | Residue | C3G10-IgM<br>Frequency (%) |      | Residue | C11B10<br>Frequency (%) |      | Residue | C10H10-IgG<br>Frequency (%) |  |
|---------|---------------------------|------|---------|----------------------------|------|---------|-------------------------|------|---------|-----------------------------|--|
| K151    | 50.9                      |      | K144    | 58.2                       |      | E143    | 97.4                    | 97.4 | K86     | 52.4                        |  |
| R151    | 47.1                      | 100  | N144    | 37.2                       | 97.0 | Y150    | 100                     | 100  | M86     | 47.4                        |  |
| I151    | 1.8                       |      | T144    | 1.5                        |      | K151    | 50.9                    |      | K151    | 50.9                        |  |
| T151    | 0.15                      |      | K151    | 50.9                       |      | R151    | 47.1                    | 100  | R151    | 47.1                        |  |
| T154    | 100                       | 100  | R151    | 47.1                       | 98.2 | I151    | 1.8                     |      | I151    | 1.8                         |  |
| G156    | 99.4                      | 99.4 | T151    | 0.15                       |      | T151    | 0.15                    |      | T162    | 99.9                        |  |
| N160    | 100                       | 100  | V175    | 99.8                       | 100  | G153    | 100                     | 100  | S163    | 52.6                        |  |
| T162    | 99.9                      | 99.9 | I175    | 0.15                       |      | T154    | 100                     | 100  | N63     | 47.4                        |  |
| S163    | 52.6                      | 100  | R176    | 100                        | 100  | T162    | 99.9                    | 99.9 | G164    | 52.4                        |  |
| N163    | 47.4                      |      | K177    | 99.9                       | 99.9 | S163    | 52.6                    | 100  | K164    | 44.7                        |  |
| G164    | 52.4                      |      | D178    | 92.4                       | 95.9 | N163    | 47.4                    |      | R164    | 2.9                         |  |
| K164    | 44.7                      | 100  | E178    | 3.5                        |      | N165    | 52.3                    |      | N165    | 52.3                        |  |
| R164    | 2.9                       |      | N211    | 94.5                       |      | S165    | 30.0                    | 99.7 | S165    | 30.0                        |  |
| N165    | 52.3                      |      | D211    | 1.8                        | 97.6 | I165    | 17.1                    |      | I165    | 17.1                        |  |
| S165    | 30.0                      |      | S211    | 1.2                        |      | K165    | 0.3                     |      | K165    | 0.3                         |  |
| I165    | 17.1                      | 99.6 | T213    | 88.6                       | 91.5 | R176    | 100                     | 100  | N179    | 84.8                        |  |
| K165    | 0.3                       |      | A213    | 2.9                        |      | K177    | 99.8                    | 99.8 | K179    | 14.2                        |  |
| N179    | 84.8                      |      | A216    | 48.9                       |      | N179    | 84.8                    | 98.9 | E212    | 52.0                        |  |
| K179    | 14.2                      | 99.7 | K216    | 47.4                       | 99.4 | K179    | 14.2                    |      | K212    | 48.0                        |  |
| D179    | 0.76                      |      | V216    | 3.05                       |      | K181    | 100                     | 100  | Q214    | 100                         |  |
| N180    | 81.2                      | 98.6 | K217    | 52.0                       |      | K217    | 52.0                    |      | K217    | 52.0                        |  |
| Y180    | 17.4                      |      | N217    | 33.7                       | 99.2 | N217    | 33.7                    | 99.9 | N217    | 33.7                        |  |
| K181    | 100                       | 100  | S217    | 13.6                       |      | S217    | 13.6                    |      | S217    | 13.6                        |  |
| K217    | 52.0                      |      | L218    | 100                        | 100  | T217    | 0.6                     |      | T217    | 0.6                         |  |
| N217    | 33.7                      |      |         |                            |      |         |                         |      | L218    | 100                         |  |
| S217    | 13.6                      | 100  |         |                            |      |         |                         |      |         |                             |  |
| T217    | 0.6                       |      |         |                            |      |         |                         |      |         |                             |  |
| I217    | 0.15                      |      |         |                            |      |         |                         |      |         |                             |  |

**Fig. S13. Frequency of potential C7G6-IgM, C3G10-IgM, C11B10 and C10H10-IgG interacting residues.** A multiple sequence alignment of 2000 full-length influenza B HA sequences from the NCBI database was used to assess genetic diversity and to calculate the frequencies of potential C7G6-IgM and C3G10-IgM interacting residues. All of the residues listed were found in the HA proteins of influenza B viruses, all of which can be neutralized by the indicated antibodies.

405  
 406  
 407  
 408  
 409  
 410  
 411  
 412  
 413  
 414  
 415  
 416  
 417  
 418  
 419  
 420  
 421  
 422  
 423  
 424  
 425  
 426  
 427  
 428  
 429  
 430  
 431  
 432  
 433  
 434  
 435  
 436  
 437  
 438  
 439  
 440  
 441  
 442  
 443  
 444  
 445  
 446  
 447  
 448  
 449  
 450  
 451  
 452  
 453  
 454  
 455  
 456  
 457  
 458  
 459

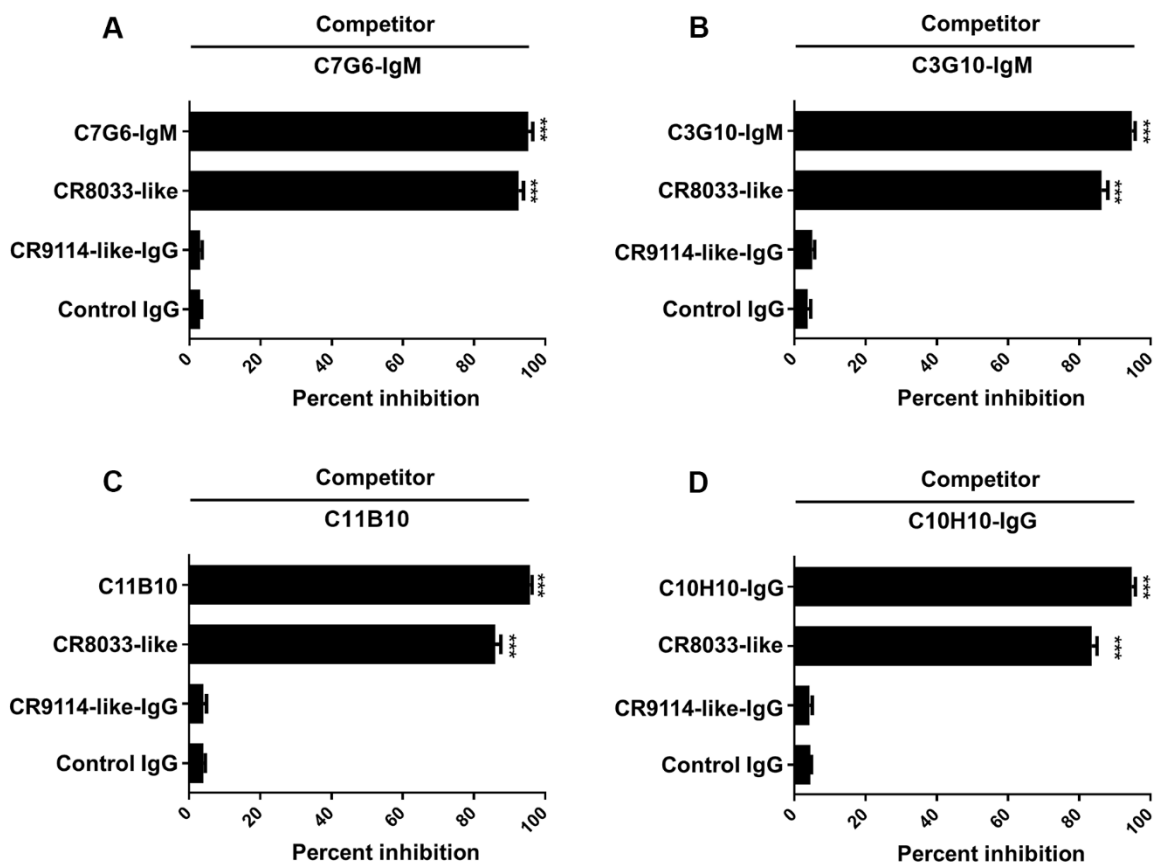

**Fig. S14. Determination of epitopes of C7G6-IgM, C3G10-IgM, C11B10 and C10H10-IgG.** Determination of epitopes of C7G6-IgM (A), C3G10-IgM (B), C11B10 (C) and C10H10-IgG (D) using a competition ELISA test with two representative bnAbs (CR8033-like and CR9114-like-IgG). C7G6-IgM, C3G10-IgM, C11B10 or C10H10-IgG was used as a competitor, and C5G6 was used as a negative control. This experiment was repeated three times; one representative dataset is shown. Bars represent averages and standard errors. \*\*\*P < 0.001, compared to the control group.

460  
 461  
 462  
 463  
 464  
 465  
 466  
 467  
 468  
 469  
 470  
 471  
 472  
 473  
 474  
 475  
 476  
 477  
 478  
 479  
 480  
 481  
 482  
 483  
 484  
 485  
 486  
 487  
 488  
 489

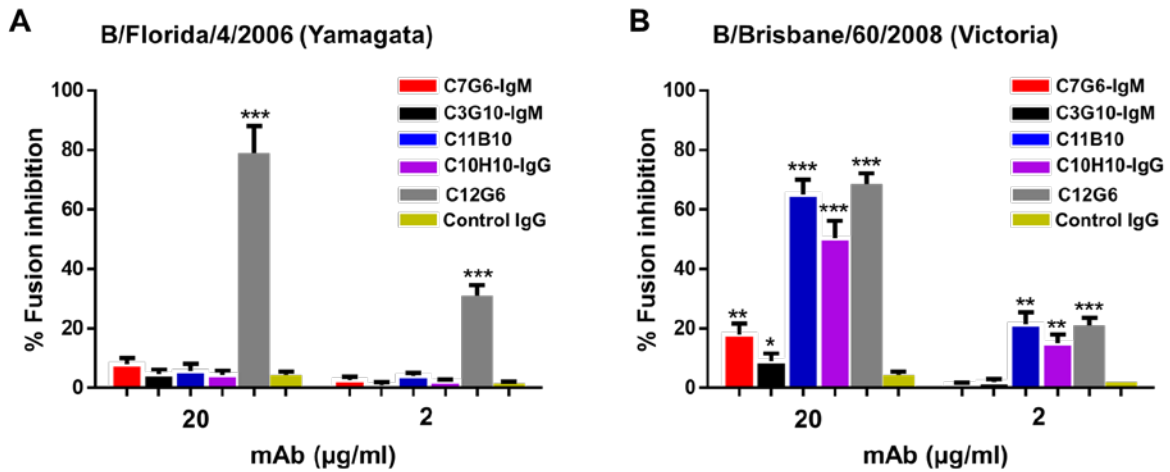

**Fig. S15. Red blood cell fusion assay.** Fusion inhibition assay using C7G6-IgM, C3G10-IgM, C11B10, C10H10-IgG, C12G6 (positive control antibody) or control IgG antibody (C5G6) incubated with (A) B/Florida/4/2006 or (B) B/Brisbane/60/2008 virus and human red blood cells and exposed to low pH to induce viral fusion. Percent fusion inhibition was calculated based on the release of NADPH into the supernatant (absorbance at 340 nm). This experiment was repeated three times, and one representative dataset is shown. Bars represent averages and standard errors. \*: P<0.05, \*\*: P<0.01, \*\*\*: P<0.001, compared to the control IgG group.
